1     **Pollutants in Hong Kong Soil: As, Cd, Cr, Cu, Hg, Pb and**  
2                                            **Zn**

3

4

5

6                                    M.K. Chung, K.C. Cheung, and M.H. Wong\*

7

8

9

10

11     *Croucher Institute for Environmental Sciences and Department of Biology, Hong*

12     *Kong Baptist University, Kowloon Tong, Kowloon, Hong Kong SAR, PR China*

13

14

15

16     \* Corresponding author. E-mail: [mhwong@hkbu.edu.hk](mailto:mhwong@hkbu.edu.hk) (M.H. Wong); tel.: +852-

17     3411-7746; fax: +852-3411-7743

18

19

20

21

22

23 **Pollutant in Hong Kong soils series:**

24

25 1.

26 Chung, M. K., Hu, R., Cheung, K. C. & Wong, M. H. Pollutants in Hong Kong soils:

27 Polycyclic aromatic hydrocarbons. *Chemosphere* 67, 464–473 (2007).

28

29 2.

30 Chung, M. K., Cheung, K. C. & Wong, M. H. Pollutants in Hong Kong Soil: As, Cd,

31 Cr, Cu, Hg, Pb and Zn

32

33 3.

34 Chung, M. K., Hu, R., Cheung, K. C. & Wong, M. H. Pollutants in Hong Kong Soils:

35 Organochlorine Pesticides and Polychlorinated Biphenyls

36

37

38 **Contact:**

39 Ming-Kei CHUNG; [jakekei@gmail.com](mailto:jakekei@gmail.com)

40

41

42

43 Abstract

44 Six heavy metals (Hg, Cu, Cd, Cr, Pb, Zn) and 1 metalloid (As) in surface soils of Hong  
45 Kong were investigated in 10 land use categories (urban park, greening area, country  
46 park, rural area, restored landfill, agricultural farmland, orchard farm, crematorium,  
47 industrial and near highway area). Edaphic Hg concentration in Hong Kong was firstly  
48 reported here. Clustering of land uses was observed based on total pollutants  
49 concentrations (sum of 7 metals). The most polluted cluster consisted of industrial and  
50 highway areas (median: 617 to 833 mg kg<sup>-1</sup>) and the runner-up cluster included urban  
51 park, greening area and restored landfill (median: 400 to 500 mg kg<sup>-1</sup>). However, this  
52 general finding was not observed for Hg, where higher concentration was found in  
53 agricultural farmland (median 109 µg kg<sup>-1</sup>). The use of low quality fertilizers, together  
54 with the contribution from exhausts and wearable parts from automobiles were believed  
55 to be the major sources of Cr, Cu and Zn in Hong Kong, while the application of Hg-  
56 containing agrochemicals maybe the main mechanism of Hg contamination in  
57 agricultural soil. Based on the daily intake assumption of 0.2 g d<sup>-1</sup> of soil particles by  
58 USEPA, direct ingestion of Hg-containing soils is not a major exposure pathway for  
59 population in Hong Kong. When comparing the edaphic heavy metal concentrations  
60 with Dutch soil quality guidelines demonstrated that Hg, Cd and Pb were not in level  
61 of health concerns, while Cu, Cr and Zn in less than 6% of total samples were found to  
62 exceed the Dutch intervention values sporadically. In contrast, suburban soils from  
63 northern and northeastern Hong Kong were mostly contaminated with As (10% of total  
64 samples) at concentration that could be potentially causing adverse health impacts to  
65 the nearby population.

66

67

68

69

70 Keywords: Urban soils, South China, Heavy Metals, Contamination, Pollution

71

## 72 **1. Introduction**

73 Environmental contamination of heavy metals has been reported world-wide, and  
74 excessive exposure to toxic metals has been commonly known to be hazardous to  
75 human health (Agency for Toxic Substances and Disease Registry, 2006). Among  
76 these toxic metals, Hg is of particular in concern as it is characterized by high vapour  
77 pressure. This unique feature makes it ubiquitous in the environment and become a  
78 global pollutant. In addition, its toxicity to human, especially childbearing women, also  
79 highlighted the concern from government agency to work on Hg reduction (Srivastava  
80 *et al.*, 2006). In countries under the European Union, Hg is classified as a dangerous  
81 chemical because of its mobility, volatility and its bioaccumulative properties within  
82 organisms and along the food chains (Mukherjee *et al.*, 2004).

83

84 A recent review on Hg contamination in China (Zhang and Wong, 2006) revealed that  
85 soil Hg contents in most cities (70 to 700  $\mu\text{g kg}^{-1}$ , 12 out of 14 cities reviewed) exceeded  
86 the background edaphic Hg value in China (65  $\mu\text{g kg}^{-1}$ ) (State Environmental Protection  
87 Administration of China, 1990). Enrichment of Hg and other metals was observed in  
88 agricultural crop soils (Wong *et al.*, 2002) and sediments (Cheung *et al.*, 2003) around  
89 the Pearl River Delta. This led to higher concentrations of all the toxic metals found in  
90 bivalves and freshwater fish collected (including from the field and available in  
91 markets) within the region (Fang *et al.*, 2001, 2003; Kong *et al.*, 2005; Zhou and Wong,  
92 2000), including seafood in Hong Kong (Tam and Mok, 1991).

93

94 In Hong Kong, it has been observed that Hg was bioaccumulated in cetaceans and Indo-  
95 Pacific hump-backed dolphins (*Sousa chinensis*) (Parsons, 1998, 1999). It was noted  
96 that the mean value of Hg in adult human hair was 3.3  $\mu\text{g g}^{-1}$  which was higher the

97 mean value for US counterpart ( $1.5 \mu\text{g g}^{-1}$ ) (Dickman and Leung, 1998), also the  
98 recommended limit for Hg in hair set by USEPA is  $1 \mu\text{g g}^{-1}$  (Gallagher, 2006). It was  
99 indicated that the elevated Hg levels were linked to subfertility in Hong Kong males  
100 (Dickman *et al.*, 1998). In addition, higher Hg levels in blood and hair of children in  
101 Hong Kong were also observed to be correlated with the frequency of fish consumption  
102 (Ip *et al.*, 2004).

103

104 Soils can act as both sinks, via dry atmospheric deposition; as well sources of toxic  
105 metals, via re-emission of semi-volatile pollutants and wind-blown of contaminated  
106 soil materials. By direct contact and inhalation of soil particles, toxic metals would  
107 pose risks to human health. In addition, leaching is also one of the important pathways  
108 to transfer toxic metals to water bodies and therefore accumulate in various aquatic  
109 organisms. Ultimately the toxic metals can enter human via consumption of food such  
110 as crops and fish, and thus understanding the levels and potential sources of toxic metals  
111 are essential to secure public health. Modeling of exposure mechanisms such as dermal  
112 contact and inhalation of dust of soil pollutants for risk assessment requires intensive  
113 data (U.S. Environmental Protection Agency, 1996c), and there is a lack of data on  
114 toxic metals especially Hg in Hong Kong soils. A more comprehensive survey of toxic  
115 metals (except Hg) in Hong Kong soils was conducted almost 10 years ago (Chen *et al.*  
116 *et al.*, 1997), and therefore there seems to be a need to provide update information for all  
117 the toxic metals contained in soils.

118

119 The present study was aimed to address the concerns mentioned above by providing  
120 current status of heavy metal and metalloid concentrations (Hg, As, Cu, Cd, Cr, Pb and  
121 Zn) in Hong Kong soils, with a special focus on Hg. To our knowledge, this is the first

122 report on edaphic Hg levels in Hong Kong and the nearby Pearl River Delta. Results  
123 are valuable as they partially filled the lacking edaphic metals (especially Hg)  
124 information in the Delta and can act as reference for other studies in the region where  
125 contamination of Hg is in raising concern by the public. Potential sources of these toxic  
126 metals are also discussed.

127

## 128 **2. Materials and Methods**

### 129 *1. Sampling and Analysis*

130 The sampling was based on 10 different land uses in Hong Kong: urban park, country  
131 park, rural area, restored landfill, agricultural farmland, orchard farm, crematorium,  
132 industrial area and nearby highway. All together there were 138 composite soil samples  
133 that taken from the depth of 0 to 5 cm from surface by a stainless steel soil core.  
134 Samples were stored in plastic bags and subsequently air-dried for 2 weeks and sieved  
135 through a 2-mm mesh.

136

137 Chemical analyses of metal contents in soils were based on standard method. 0.25 g of  
138 soil sample was mixed with 9 mL nitric acid, 3 mL hydrofluoric acid and 1 mL  
139 hydrochloric acid and subjected to microwave-assisted acid digestion (USEPA 3052)  
140 (U.S. Environmental Protection Agency, 1996a). The solutions were then filtered  
141 through Advantec 5C filter paper, diluted and made up with deionized water in a 50-ml  
142 plastic volumetric flask. Concentrations of As, Cu, Cd, Cr, Pb, and Zn were determined  
143 by inductively coupled plasma - optical emission spectrometry (ICP-OES) (Perkin-  
144 Elmer Optima 3000 DV), while Hg was quantified by Flow Injection Mercury System  
145 (FIMS) (Perkin-Elmer FIMS-400) based on the cold-vapor atomic absorption  
146 spectrometry (CVAA) (U.S. Environmental Protection Agency, 1996b). Limit of

147 detection (LOD) for Hg was 0.5  $\mu\text{g kg}^{-1}$ , while 50  $\mu\text{g kg}^{-1}$  for Cd, Cr, Cu and Zn, and  
148 100  $\mu\text{g kg}^{-1}$  for As and Pb.

149

## 150 2. *Quality assurance and Data analysis*

151 Standard Reference Material (SRM) 2711 was obtained from National Institute of  
152 Standards and Technology (NIST, USA). An analytical blank and the SRM were  
153 included in every batch of microwave acid digestion to assess the recoveries and  
154 performance of extraction.

155

156 Mean individual recoveries were:  $83 \pm 2\%$  (Hg),  $102 \pm 5\%$  (As),  $88 \pm 1\%$  (Cd),  $97 \pm$   
157  $1\%$  (Cu),  $107 \pm 4\%$  (Pb) and  $89 \pm 2\%$  (Zn). On average, the recoveries of all the  
158 investigated elements in SRM were all  $> 94\%$ . Statistical analyses including  
159 descriptive statistics, correlation analysis, and PCA analysis were conducted with  
160 Statistica (version 6.0 from StatSoft). Not detected values were substituted with half  
161 of lowest limit of detection (LOD) only for descriptive statistics.

162

## 163 3. **Results and Discussion**

### 164 1. *Concentration of pollutants in Hong Kong*

165 Kriged maps were constructed to show the spatial distribution of investigated pollutants  
166 (Figure 1), and it is observed that most of the hotspots for pollutants were found in the  
167 northern part of Hong Kong. In addition, clustering of soil pollutant concentrations in  
168 land uses was also observed (Table 1). Total heavy metal concentrations were highest  
169 in industrial area and area nearby highway (median 617 and 833  $\text{mg kg}^{-1}$ ); while similar  
170 for urban park, greening area and restored landfill (median 400 to 500  $\text{mg kg}^{-1}$ ), and the  
171 rest of the land uses are least contaminated (median 200 to 350  $\text{mg kg}^{-1}$ ). The general

172 findings that soils in industrial area and adjacent to highways were most contaminated  
173 can also be observed when considering the pollutant individually, but excluding Hg.  
174 Variations in pollutant concentration were usually greatest in urban park, which  
175 spanned up to 3 orders of magnitude, and large variations were found in most of the  
176 land uses, which reflects the heterogeneity of pollutants concentrations is under the  
177 strong influence of local activities or pollution sources.

178

179 Hg concentration was ranged from non detectable (N.D.) to 3790  $\mu\text{g kg}^{-1}$ , and the 10  
180 most contaminated soil samples were found in urban parks, greening areas and farms  
181 (29 and 3790  $\mu\text{g kg}^{-1}$ ). The 5 locations with highest Hg levels were: urban parks in  
182 Kwun Tong (633  $\mu\text{g kg}^{-1}$ ), Central (985  $\mu\text{g kg}^{-1}$ ) and Tuen Mun (3785  $\mu\text{g kg}^{-1}$ ) and  
183 agricultural farm in Sha Tin (762  $\mu\text{g kg}^{-1}$ ) and Tai Po (2196  $\mu\text{g kg}^{-1}$ ). The usual contents  
184 of Hg in soils are in the range of 0.01 to 0.03  $\mu\text{g kg}^{-1}$  (Senesi *et al.*, 1999). For  
185 contaminated areas such as Hg mine, Hg concentrations in soils were a thousand folds  
186 more (Loredo *et al.*, 1999). Median Hg levels in urban soil in Korea and Norway were  
187 45 and 130  $\mu\text{g kg}^{-1}$  respectively (Kim and Kim, 1999; Reimann and Caritat, 1998). The  
188 mean and median Hg concentrations in Hong Kong were 135 and 70.5  $\mu\text{g kg}^{-1}$   
189 respectively, which were broadly in line with the Hg concentrations observed in major  
190 cities in China (Beijing: 509  $\mu\text{g kg}^{-1}$ , Chongqing: 319  $\mu\text{g kg}^{-1}$ , Wuhan: 314  $\mu\text{g kg}^{-1}$ )  
191 (Liu *et al.*, 1998; Wang, 2001; Wang *et al.*, 2005). In addition, the concentration ranges  
192 of Cd (N.D. to 4.11  $\text{mg kg}^{-1}$ ), Cr (N.D. to 2500  $\text{mg kg}^{-1}$ ), and Pb (11 to 490  $\text{mg kg}^{-1}$ ) in  
193 the present study (Table 1) were similar to those reported in Shenyang, Beijing, Nanjing  
194 and Xi'an, China (Fang *et al.*, 2004; Wang *et al.*, 2001). However, the range of As  
195 (N.D. to 336  $\text{mg kg}^{-1}$ ) was generally higher for an order of magnitude when compared  
196 with those reported in major cities in China (Wang *et al.*, 2001). This implied that there



197 are significant sources of As in Hong Kong that are absent from the aforementioned  
198 cities. Mean concentrations of Cu (37.2 mg kg<sup>-1</sup>) and Zn (276 mg kg<sup>-1</sup>) in Hong Kong  
199 were closed to those found in Nanjing (Cu: 40.4 mg kg<sup>-1</sup>, Zn: 280 mg kg<sup>-1</sup>) (Wu *et al.*,  
200 2003), but higher than those reported in Guangzhou (Cu: 9.62 mg kg<sup>-1</sup>, Zn: 115.4 mg  
201 kg<sup>-1</sup>) (Guan *et al.*, 2001).

202

## 203 2. Statistical analyses among pollutants and their potential sources

204 The correlations among Cu, Cr and Zn were also identified by principal factor 1 (PC 1)  
205 in the PCA plots shown in Figure 2a. Cadmium was excluded for PCA because of a  
206 large set of not-detected value. PC 1 was able to explain 56% of the variance while PC  
207 2 explained 16%. Together they extracted 72% of the total variance from the present  
208 study. However, PC2 represented an antagonistic relationship between Hg and As.  
209 Figure 2b shows the projection of sampling points to the factor plane. Samples from 2  
210 different urban parks in New Territories contained very high level of metals (Cu, Cr  
211 and Zn) and Hg. Certain agricultural farms and soils from rural and adjacent to highway  
212 in the New Territories were best explained by PC2, implied that they are either high in  
213 Hg or As concentration. Arsenic level was reported to be higher in industrial and heavy  
214 traffic sites (Deb *et al.*, 2002), and the present study also indicated higher level of  
215 edaphic As in the vicinity of highways.

216

217 Arsenic has both natural and anthropogenic sources, and their anthropogenic origins  
218 included agrochemicals such as herbicides and pesticides (in form of monosodium  
219 methanearsonate), and wood preservative (arsenic trioxide) (USGS, 2006). Since high  
220 levels of As (>100 mg kg<sup>-1</sup>) were found chiefly in soil samples collected nearby  
221 highways, it is expected that automobiles could be the major contributor of As through

222 burning of fossil fuel and wearing of the As-containing babbitt bearings. Many of the  
223 soil samples with As ranged from 30 to 100 mg kg<sup>-1</sup> were collected in the northern rural  
224 part of Hong Kong, in which historical use of agrochemicals containing As would be  
225 the main contributor of As in soils.

226

227 Higher Hg levels were observed in soils of parks and farms with plantation (Table 1).  
228 Similar to As, the origin of Hg can be both anthropogenic and natural, such as ore  
229 mining and forest fire. Certain fertilizers, pesticides and fungicides are known to  
230 contain Hg (Matthews *et al.*, 1995; Nakagawa and Hiromoto, 1997). Therefore, the Hg  
231 concentrations found in farmlands, orchard farms and urban parks maybe due to the use  
232 of agrochemicals. The world-wide average of Hg content in coal is  $0.1 \pm 0.01$  mg kg<sup>-1</sup>,  
233 whereas coals from southern China were enriched in Hg by 1 to 2 orders of magnitude  
234 (Yudovich and Ketris, 2005). Due to the fact that Hong Kong is located at the southern  
235 tip of PRD, which is known for its electrical and electronic manufacturing industry, the  
236 high power demand and the associated emission of Hg is likely to create a regional Hg  
237 problem (Wang *et al.*, 2006), and hence contributes to Hg level in Hong Kong soils.

238

239 Higher levels of Hg in human hair leading to subfertility in males have been suspected  
240 to link with higher rates of fish consumption in Hong Kong (Dickman *et al.*, 1998;  
241 Dickman and Leung, 1998). The average consumption rate of seafood is about 60 kg  
242 yr<sup>-1</sup> person<sup>-1</sup>, which is equivalent to 167 g d<sup>-1</sup> person<sup>-1</sup>, and the mean Hg levels in marine  
243 and freshwater fish available in markets were 120 and 80 µg kg<sup>-1</sup> respectively (Dickman  
244 and Leung, 1998). The present study showed that the average Hg level of 135 µg kg<sup>-1</sup>  
245 in Hong Kong soils is slightly higher than those reported in fish. However, the assumed  
246 ingestion amount of soil particles for children (15 kg in weight) is 0.2 g d<sup>-1</sup> when

247 calculating the soil screening level for residential exposure of soil pollutants (U.S.  
248 Environmental Protection Agency, 1996c), which is 833 folds less than the average  
249 intake rate of fish (167 g d<sup>-1</sup>). It is therefore believed that the direct ingestion of Hg-  
250 contaminated soils is not a major health concern in Hong Kong.

251

252 Table 2 shows the most prominent correlations were Cu-Cr, Cu-Pb and Cu-Zn, which  
253 were found in 5 out of 10 different land uses. Soil samples collected adjacent to  
254 highway, country park, agricultural farmland, crematorium and industrial area did not  
255 show more than 2 significant correlations. It is a common practice to use compost as  
256 soil conditioner in urbanized areas. In Hong Kong, the sources for composting are  
257 largely derived from livestock wastes from pig and poultry farms under the free  
258 livestock waste collection service provided by the government. Pig manure contains  
259 high levels of Cu and Zn (Bowland, 1990) as common additives in pig feed to increase  
260 the feed conversion efficiency and economic returns (Jin *et al.*, 1995). Cases of  
261 excessive addition of Cu and Zn in feeds were noted (Kessler *et al.*, 1994), and  
262 considerable amounts of these metals were also reported in local composts (Wong,  
263 1990). Apart from compost, fertilizers are also known to contain As, Cd, Cr, Pb and  
264 Zn (Guan *et al.*, 2001; Renner, 2004). Land application of sewage sludge was also  
265 reported to be the principle sources of heavy metals, especially Cd and As (Chu and  
266 Wong, 1984; Elinder, 1985), but this possibility can be ruled out since sludge is  
267 commonly dumped in domestic landfills in Hong Kong. In England and Wales soil,  
268 greatest inputs of Zn and Cu were from animal manure and greatest inputs of Cr were  
269 from industrial wastes (McGrath, 2000). The significant correlations of Cu-Cr, Cu-Pb  
270 and Cu-Zn implied that they are derived from the same sources, and the most likely  
271 source of these metals in Hong Kong soil is from low quality fertilizers, because of its

272 ease of application and more stable quality than compost. In addition, Zn and Cu are  
273 pollutants associated with automobiles (Viklander, 1997). Approximately 3% of ZnO  
274 is commonly added to the tyres of vehicles as a vulcanization agent and the wear of  
275 tyres can be a significant source of Zn in urban areas (Friedlander, 1973). Other heavy  
276 metal compounds including Cu, Cd and Pb (~0.002%, <0.001% and <0.005%  
277 respectively) are identified in tyres (UNEP, 2000). Other wearable parts of vehicles  
278 such as brake and brake lining also contained high contents of Cu, Pb and Zn (80 to 24  
279 000 mg kg<sup>-1</sup>) (Westerlund, 2001) and therefore contribute a significant portion of heavy  
280 metals in soils.

281

282 Lead pollution in cities was commonly recognized as one of the major pollutants caused  
283 by vehicle emissions (Yang *et al.*, 2000). Hong Kong government introduced unleaded  
284 petrol (ULP) in 1991 and banned the supply, sale and dispensing of leaded petrol as  
285 well as any fuel additives containing Pb in 1999 (Hong Kong Environmental Protection  
286 Department, 1999), resulting in a decline of Pb concentration in street dust of Hong  
287 Kong from 1300 ± 1400 mg kg<sup>-1</sup> (Yim and Nau, 1987) to 180 ± 93 mg kg<sup>-1</sup> (Li *et al.*,  
288 2001).

289

290 Atmospheric deposition from nearby regions also represents another important input of  
291 heavy metals such as Cr, Cu, Pb and Zn to surface soils. According to a quality  
292 monitoring program in China (General Administration of Quality Supervision  
293 Inspection and Quarantine of the People's Republic of China, 2004), only about 70%  
294 of the unleaded petrol samples in China was found to comply with the national standard.  
295 In some cases, Pb level was exceeded more than 200 times to the standards. Study on  
296 atmospheric deposition in the PRD revealed that the deposition of Cr, Cu, Pb and Zn

297 (6.43 ± 3.19, 18.6 ± 7.88, 12.7 ± 6.72 and 104 ± 36.4 mg m<sup>-1</sup> yr<sup>-1</sup>) was significantly  
298 higher when compared with Europe and North America (Wong *et al.*, 2003). Long-  
299 range transport of air-borne pollutants or wind-blown contaminated soil particles from  
300 Mainland China by the northeast monsoon was reported (Lee and Hills, 2003).  
301 Moreover, atmospheric input was reported to be the major contributor of Pb, Cd, As  
302 and Hg in agricultural soils in England and Wales (Nicholson *et al.*, 2006), and thus  
303 atmospheric deposition, either locally or regionally, may play a significant role for the  
304 presence of particle-bound pollutants in soils.

305

### 306 *3. Comparison of soils cleanup criteria*

307 The soil quality guideline values on the various pollutants investigated imposed by  
308 Netherlands (Dutch Guidelines) (Ministry of Housing Spatial Planning and  
309 Environment, 2000), Sweden (Soil Remediation Goals) (Swedish Environmental  
310 Protection Agency, 2002), England (Kelly Indices) (Contaminated Land Assessment &  
311 Remediation Research Centre, 2004) and China (Environmental Quality Standard)  
312 (State Environmental Protection Administration of China, 1995) are summarized in  
313 Table 3. As Dutch guideline is the most comprehensive and commonly used,  
314 comparisons the present findings are made chiefly with the Dutch values. Mercury, Cd  
315 and Pb in 138 samples were below the Dutch intervention values, suggesting that the  
316 concentrations of these metals in soils were not hazardous to human. In terms of As,  
317 Cu, Cr and Zn, most of their levels did not exceed the Dutch intervention values, but  
318 there were sporadic soil samples containing levels of As, Cu, Cr and Zn exceeded the  
319 intervention values (14, 3, 2, and 8 out of 138 samples correspondingly). Nine out of  
320 10 suburban samples from the northern and northeastern New Territories contained As  
321 concentrations greater than the Dutch intervention value. Thus, it is suspected that a

322 large part of northern and northeastern in Hong Kong is contaminated with As at  
323 concentration that can impose adverse effects on human health. Soil samples with Zn  
324 concentration greater than the intervention value were mainly noted in industrial areas,  
325 and this is also true for Cu and Cr. For the scarcity and remoteness of the hotspots (Cr,  
326 Cu, and Zn), their potential adverse impacts to the general public were kept to  
327 minimum. In England, soil remediation is often required before further development  
328 on brownfield soils as they are typically contaminated with high levels of heavy metals  
329 due to past industrial activities (French *et al.*, 2006). Although leaching of toxic metals  
330 to underground water is not a major concern as Hong Kong relies mainly on river water  
331 transported from the mainland as well as rainwater collected locally, the fact that more  
332 than 10% of the soil samples were highly contaminated with As warrants further  
333 investigation. This is especially true if any of these sites (north and north-east of the  
334 New Territories) are used for residential development in the future.

335

#### 336 **4. Conclusions**

337 In terms of total concentrations of all the metals (metalloids), industrial and highway  
338 areas were the most contaminated. This finding is also true for individual elements  
339 (As, Cd, Cr, Cu, Pb and Zn) other than Hg. It was found that Hg concentration was the  
340 highest in soil collected from agricultural farmland, which could be attributed to the  
341 application of Hg-containing agrochemicals. The use of low quality fertilizers is also  
342 believed to be the main source of As, Cu and Zn, while substantial contributions of  
343 pollutants by exhausts and wearable parts from automobiles are also suspected.  
344 Atmospheric deposition from local and nearby regions is also believed to be a major  
345 source of edaphic metals in Hong Kong. A reduction of Pb in soils during the past 10  
346 to 15 year was chiefly due to the use of Pb-free petrol. It is expected all the metals

347 (metalloids) would not cause any potential health impacts to the general public, except  
348 As, due to its high concentrations in northern and northeastern suburbs in Hong Kong.

349

### 350 **Acknowledgments**

351 The authors are grateful to Mr. Y.Y. Chin from the Leisure and Cultural Services  
352 Department (LCSD, HKSAR) for providing technical assistance. Financial support  
353 from the Strategic Research Fund, Science Faculty, HKBU and the Area of Excellence  
354 (AoE) Scheme (CITYU/AoE/03-04/02) under the University Grants Committee of  
355 Hong Kong is gratefully acknowledged.

356

357

358

359

360

361

362

363

364 **Figure Captions:**

365 Figure 1. Kriged maps of pollutants (As, Cd, Cr, Cu, Hg, Pb, and Zn) concentrations  
366 (mg kg<sup>-1</sup>) in surface soils of Hong Kong.

367

368 Figure 2. Plots with PC 1 and PC 2 from principal component analysis as X and Y  
369 axis on various pollutants and sampling points. PC 1 was able to explain 49% while  
370 PC 2 accounted for another 19% of the total variance. Note that Cd were excluded  
371 from PCA because of a large set of not-detected value. A: Biplot showing the loading  
372 of 6 pollutants on PC 1 and PC 2. B: Scatter plot of sampling points projecting on the  
373 PC 1 and PC 2 plane.

374

375

376

377

378

379

380

381

382

383

384

385

386

387

388

389

390

391

392

393

394

395

396

397



Table 1. Mean, median, and range of concentration of studied pollutants (mg kg<sup>-1</sup>) in Hong Kong soils. Note that concentration unit of Hg  $\mu\text{g kg}^{-1}$ .

| Classified soil categories | Sample no. | Hg                                          |        |               | As    |        |              | Cu                             |        |               | Cd               |        |               |
|----------------------------|------------|---------------------------------------------|--------|---------------|-------|--------|--------------|--------------------------------|--------|---------------|------------------|--------|---------------|
|                            |            | Mean                                        | Median | Range         | Mean  | Median | Range        | Mean                           | Median | Range         | Mean             | Median | Range         |
|                            |            | Concentration in soils ( $\mu\text{g/kg}$ ) |        |               |       |        |              | Concentration in soils (mg/kg) |        |               |                  |        |               |
| Urban park                 | 39         | 232                                         | 75.0   | [N.D. - 3785] | 19.4  | 16.5   | [N.D. - 122] | 81.41                          | 13.0   | [N.D. - 2129] | 0.56             | 0.01   | [N.D. - 2.93] |
| Greening area              | 14         | 104                                         | 66.0   | [N.D. - 311]  | 26.6  | 26.6   | [N.D. - 97]  | 21.46                          | 15.1   | [N.D. - 59]   | 0.50             | 0.01   | [N.D. - 2.25] |
| Country park               | 9          | 52                                          | 25.0   | [N.D. - 128]  | 36.1  | 20.3   | [3.6 - 95]   | 11.0                           | 0.01   | [N.D. - 93]   | 0.36             | 0.01   | [N.D. - 2.42] |
| Rural area                 | 19         | 75                                          | 81.0   | [N.D. - 202]  | 27.6  | 20.5   | [3.2 - 143]  | 7.32                           | 6.08   | [N.D. - 28]   | 0.37             | 0.01   | [N.D. - 2.91] |
| Restored landfill          | 11         | 50                                          | 25.0   | [N.D. - 119]  | 22.0  | 22.8   | [N.D. - 47]  | 19.3                           | 11.0   | [N.D. - 62]   | 0.85             | 0.01   | [N.D. - 2.86] |
| Agricultural farmland      | 9          | 402                                         | 109    | [N.D. - 2196] | 27.2  | 15.2   | [N.D. - 109] | 12.0                           | 6.61   | [N.D. - 66]   | 0.14             | 0.01   | [N.D. - 0.77] |
| Orchard farm               | 5          | 154                                         | 72.0   | [N.D. - 555]  | 34.3  | 30.4   | [7.3 - 93]   | 8.86                           | 5.60   | [N.D. - 27]   | 0.56             | 0.01   | [N.D. - 1.6]  |
| Crematorium                | 10         | 75                                          | 78.0   | [N.D. - 146]  | 13.8  | 11.5   | [N.D. - 50]  | 4.29                           | 0.61   | [N.D. - 16]   | 0.13             | 0.01   | [N.D. - 1.21] |
| Industrial area            | 18         | 74                                          | 73.0   | [N.D. - 237]  | 25.5  | 25.4   | [N.D. - 61]  | 52.34                          | 33.3   | [N.D. - 396]  | 1.19             | 0.67   | [N.D. - 4.11] |
| Nearby highway             | 4          | 134                                         | 117    | [N.D. - 277]  | 174.6 | 141    | [80.5 - 336] | 18.75                          | 15.4   | [3.62 - 41]   | 0.01             | 0.01   | [N.D. - N.D.] |
| Classified soil categories | Sample no. | Cr                                          |        |               | Pb    |        |              | Zn                             |        |               | Total pollutants |        |               |
|                            |            | Mean                                        | Median | Range         | Mean  | Median | Range        | Mean                           | Median | Range         | Mean             | Median | Range         |
|                            |            | Concentration in soils (mg/kg)              |        |               |       |        |              |                                |        |               |                  |        |               |
| Urban park                 | 39         | 50.5                                        | 21.9   | [1.85 - 601]  | 141   | 130    | [11 - 305]   | 293                            | 197    | [13 - 3508]   | 586              | 401    | [29 - 6553]   |
| Greening area              | 14         | 20.8                                        | 18.2   | [1.23 - 44]   | 142   | 144    | [104 - 188]  | 367                            | 300    | [114 - 1182]  | 578              | 540    | [300 - 1351]  |
| Country park               | 9          | 7.18                                        | 2.00   | [N.D. - 23]   | 75    | 68     | [56 - 115]   | 75                             | 85     | [38 - 110]    | 204              | 204    | [101 - 357]   |
| Rural area                 | 19         | 17.0                                        | 12.1   | [0.81 - 57]   | 136   | 124    | [53 - 244]   | 183                            | 135    | [43 - 555]    | 371              | 377    | [155 - 763]   |
| Restored landfill          | 11         | 25.1                                        | 24.9   | [11.8 - 37]   | 189   | 180    | [47 - 393]   | 170                            | 146    | [79 - 347]    | 426              | 425    | [221 - 680]   |
| Agricultural farmland      | 9          | 22.7                                        | 17.9   | [7.36 - 54]   | 121   | 120    | [79 - 161]   | 197                            | 152    | [63 - 564]    | 380              | 303    | [234 - 845]   |
| Orchard farm               | 5          | 16.3                                        | 12.4   | [5.73 - 34]   | 104   | 91     | [64 - 186]   | 116                            | 95     | [45 - 243]    | 280              | 236    | [145 - 479]   |
| Crematorium                | 10         | 27.3                                        | 21.1   | [11.5 - 88]   | 118   | 96     | [65 - 277]   | 140                            | 126    | [89 - 221]    | 304              | 263    | [180 - 515]   |
| Industrial area            | 18         | 167                                         | 29.1   | [11.3 - 2486] | 221   | 183    | [92 - 493]   | 529                            | 298    | [75 - 1631]   | 996              | 617    | [214 - 3033]  |
| Nearby highway             | 4          | 35.5                                        | 35.4   | [15.7 - 55]   | 147   | 134    | [115 - 205]  | 556                            | 349    | [158 - 1367]  | 932              | 833    | [409 - 1653]  |

400  
401

Table 2. Correlation matrix of investigated metals in different land uses in Hong Kong.

|                |    | Urban park        |       |       |        |        |       | Agricultural farmland |                 |    |       |       |       |       |       |       |       |
|----------------|----|-------------------|-------|-------|--------|--------|-------|-----------------------|-----------------|----|-------|-------|-------|-------|-------|-------|-------|
|                |    | Hg                | As    | Cu    | Cd     | Cr     | Pb    | Zn                    |                 |    | Hg    | As    | Cu    | Cd    | Cr    | Pb    | Zn    |
| Greening area  | Hg |                   | -0.06 | 0.04  | 0.2    | 0.01   | 0.12  | 0.03                  | Orchard farm    | Hg |       | -0.2  | 0.16  | -0.23 | 0.13  | 0.25  | 0.08  |
|                | As | 0.46              |       | -0.04 | 0.12   | -0.07  | -0.16 | -0.76                 |                 | As | -0.61 |       | -0.15 | 0.36  | -0.45 | -0.55 | -0.43 |
|                | Cu | 0.13              | 0.54* |       | -0.09  | 0.87*  | 0.47* | 0.98*                 |                 | Cu | -0.19 | 0.83  |       | -0.21 | 0.62  | 0.53  | 0.86* |
|                | Cd | 0.14              | 0.47  | 0.53* |        | -0.17  | 0.15  | -0.08                 |                 | Cd | 0.4   | 0.84  | 0.73  |       | -0.2  | -0.65 | -0.18 |
|                | Cr | 0.14              | 0.46  | 0.80* | 0.26   |        | 0.49* | 0.82*                 |                 | Cr | -0.14 | 0.15  | 0.66  | 0.15  |       | 0.48  | 0.90* |
|                | Pb | -0.4              | -0.16 | 0.53  | 0.19   | 0.35   |       | 0.54*                 |                 | Pb | -0.1  | -0.35 | 0.23  | -0.27 | 0.87  |       | 0.6   |
|                | Zn | -0.08             | -0.2  | 0.1   | -0.23  | 0.33   | 0.13  |                       |                 | Zn | -0.17 | 0.82  | 0.99* | 0.74  | 0.62  | 0.2   |       |
|                |    | Country park      |       |       |        |        |       | Crematorium           |                 |    |       |       |       |       |       |       |       |
|                |    | Hg                | As    | Cu    | Cd     | Cr     | Pb    | Zn                    |                 |    | Hg    | As    | Cu    | Cd    | Cr    | Pb    | Zn    |
| Rural area     | Hg |                   | -0.32 | -0.21 | -0.51  | 0.67*  | 0.52  | 0.18                  | Industrial area | Hg |       | -0.08 | 0.25  | 0.18  | 0.33  | -0.16 | 0.07  |
|                | As | 0.31              |       | 0.3   | 0.44   | 0.03   | 0.09  | 0.18                  |                 | As | 0.05  |       | 0.09  | 0.85* | 0.1   | 0.14  | -0.04 |
|                | Cu | 0.41              | 0.49* |       | 0.01   | 0.43   | 0.51  | 0.1                   |                 | Cu | 0.78* | -0.08 |       | -0.18 | 0.82* | 0.13  | 0.72* |
|                | Cd | 0.02              | 0.70* | 0.43  |        | -0.23  | -0.31 | 0.47                  |                 | Cd | 0.17  | 0.08  | -0.19 |       | -0.05 | -0.16 | -0.35 |
|                | Cr | 0.37              | 0.4   | 0.27  | -0.03  |        | 0.79* | 0.6                   |                 | Cr | 0.07  | -0.42 | 0.02  | 0.22  |       | -0.05 | 0.53  |
|                | Pb | -0.16             | -0.22 | -0.08 | -0.28  | -0.1   |       | 0.29                  |                 | Pb | -0.26 | -0.14 | 0.14  | -0.11 | -0.15 |       | 0.61  |
|                | Zn | 0.48*             | -0.03 | 0.12  | -0.2   | 0.27   | 0.14  |                       |                 | Zn | 0.2   | -0.31 | 0.43  | -0.21 | -0.06 | 0.4   |       |
|                |    | Restored landfill |       |       |        |        |       |                       |                 |    |       |       |       |       |       |       |       |
|                |    | Hg                | As    | Cu    | Cd     | Cr     | Pb    | Zn                    |                 |    |       |       |       |       |       |       |       |
| Nearby highway | Hg |                   | 0.07  | -0.36 | -0.62* | -0.21  | -0.23 | 0.39                  |                 |    |       |       |       |       |       |       |       |
|                | As | -0.76             |       | -0.43 | -0.09  | -0.79* | -0.54 | -0.4                  |                 |    |       |       |       |       |       |       |       |
|                | Cu | -0.68             | 0.77  |       | 0.27   | 0.80*  | 0.61* | 0.51                  |                 |    |       |       |       |       |       |       |       |
|                | Cd | Nil               | Nil   | Nil   |        | 0.35   | 0.39  | -0.55                 |                 |    |       |       |       |       |       |       |       |
|                | Cr | -0.84             | 0.75  | 0.96* | Nil    |        | 0.80* | 0.47                  |                 |    |       |       |       |       |       |       |       |
|                | Pb | -0.67             | 0.84  | 0.99* | Nil    | 0.92   |       | 0.19                  |                 |    |       |       |       |       |       |       |       |
|                | Zn | 0.07              | -0.42 | 0.25  | Nil    | 0.27   | 0.11  |                       |                 |    |       |       |       |       |       |       |       |

402

Pearson correlation coefficients were shown. Values with \* indicated that significant correlations were found at p=0.05.

403  
404  
405  
406  
407

Table 3. Soil quality guidelines from Netherlands, Sweden, United Kingdom and China, and their recommended values for Hg, As, Cu, Cd, Cr, Pb and Zn in soils.

| Country of implementation | Quality guidelines                                 | Hg                             | As | Cu   | Cd  | Cr  | Pb  | Zn   |
|---------------------------|----------------------------------------------------|--------------------------------|----|------|-----|-----|-----|------|
|                           |                                                    | Concentration in soils (mg/kg) |    |      |     |     |     |      |
| Netherlands               | Dutch target value                                 | 0.3                            | 29 | 36   | 0.8 | 100 | 85  | 140  |
|                           | Dutch intervention value                           | 10                             | 55 | 190  | 12  | 380 | 530 | 720  |
| Sweden                    | Soil remediation goals for sensitive land use      | N.A.                           | 15 | 100  | 0.4 | 120 | 80  | 350  |
|                           | Soil remediation goals for less sensitive land use | N.A.                           | 40 | 200  | 12  | 250 | 300 | 700  |
| United Kingdom            | Kelly                                              | 1                              | 30 | N.A. | 1   | 100 | 500 | N.A. |
| China                     | Environmental quality standard                     | 0.5                            | 30 | 200  | 0.6 | 300 | 300 | 250  |

408

409

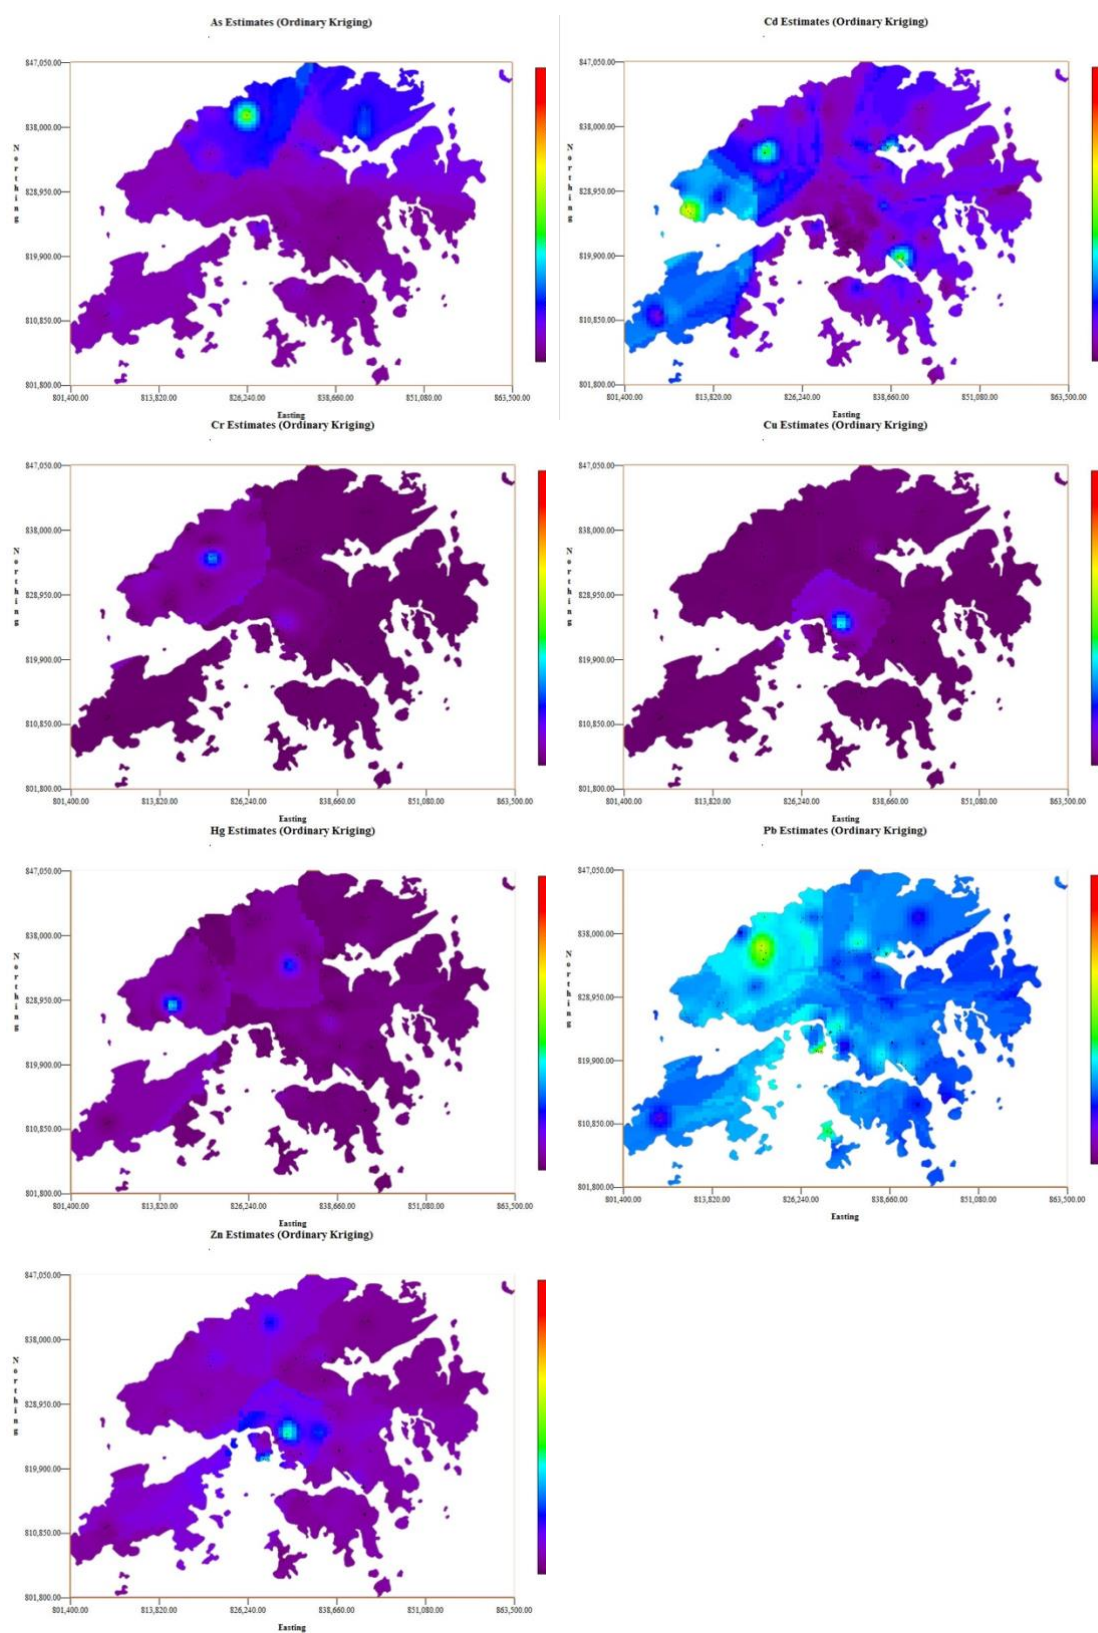

410

411 Figure 1. Kriged maps of pollutants (As, Cd, Cr, Cu, Hg, Pb, and Zn) concentrations

412 (mg kg<sup>-1</sup>) in surface soils of Hong Kong.

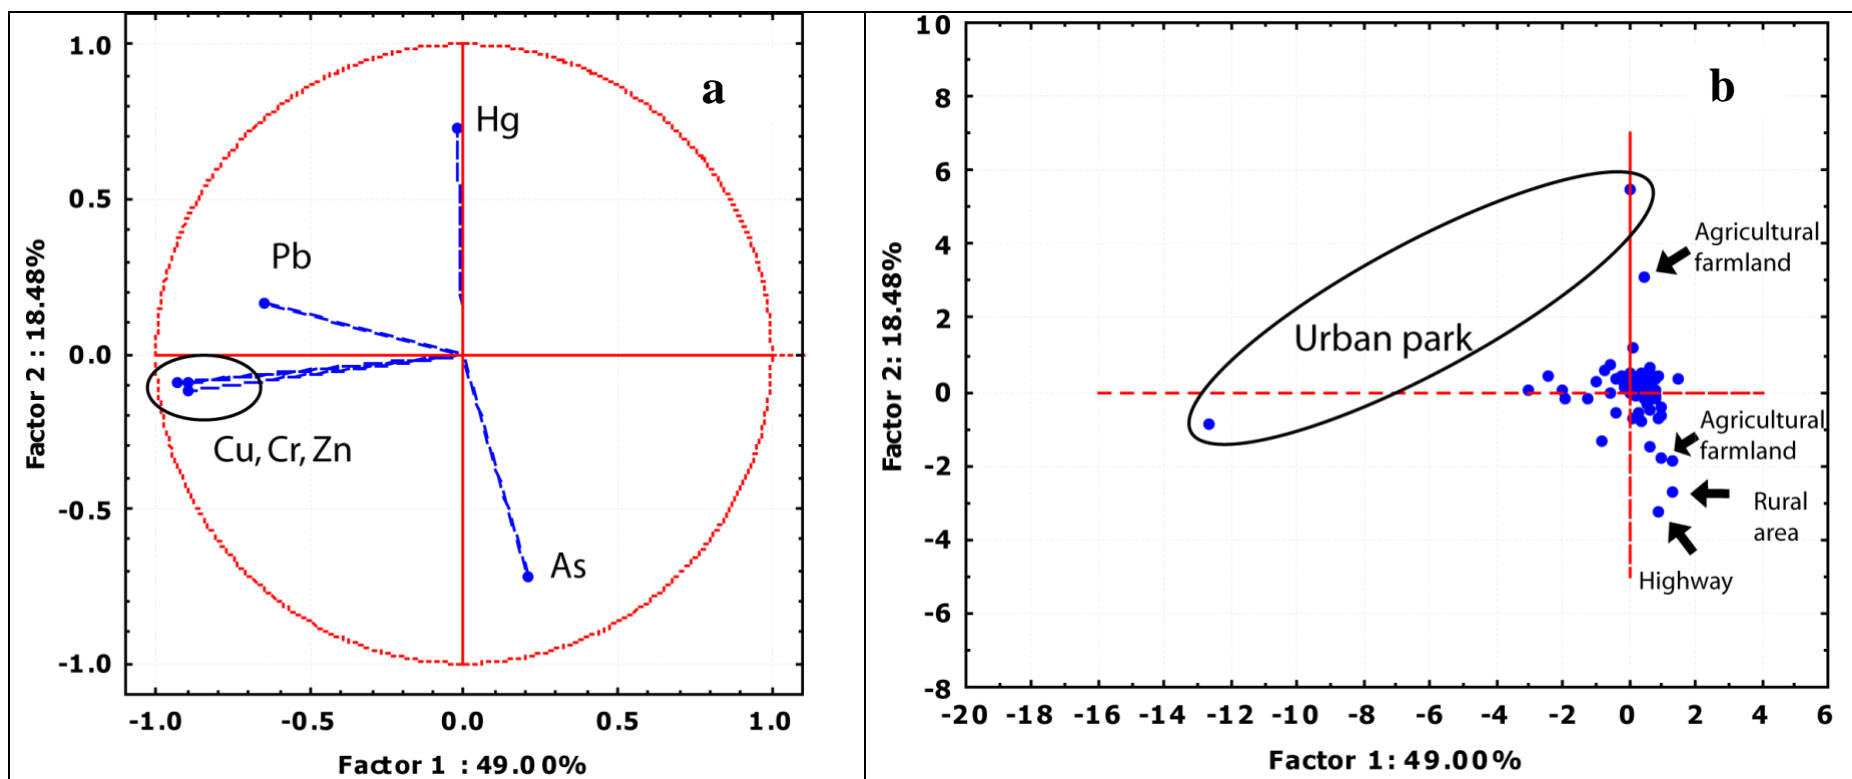

413

414 Figure 2. Plots with PC 1 and PC 2 from principal component analysis as X and Y axis on various pollutants and sampling points. PC 1 was able to  
 415 explain 49% while PC 2 accounted for another 19% of the total variance. Note that Cd were excluded from PCA because of a large set of not-detected  
 416 value. A: Biplot showing the loading of 6 pollutants on PC 1 and PC 2. B: Scatter plot of sampling points projecting on the PC 1 and PC 2 plane.



418 References

419

420 Agency for Toxic Substances and Disease Registry. (2006). Toxicological Profile  
421 Information Sheet Retrieved August 21, 2006, from Agency for Toxic Substances  
422 and Disease Registry Web site: <http://www.atsdr.cdc.gov/toxpro2.html>

423 Bowland, J.P. (1990). Copper as a performance promoter for pigs. *Pig News Inf.*, 11(2),  
424 163-167.

425 Chen, T.B., Wong, J.W., Zhou, H.Y., Wong, M.H. (1997). Assessment of trace metal  
426 distribution and contamination in surface soils of Hong Kong. *Environ. Pollut.*,  
427 96(1), 61-68.

428 Cheung, K.C., Poon, B.H., Lan, C.Y., Wong, M.H. (2003). Assessment of metal and  
429 nutrient concentrations in river water and sediment collected from the cities in the  
430 Pearl River Delta, South China. *Chemosphere*, 52(9), 1431-1440.

431 Chu, L.M., Wong, M.H. (1984). Application of refuse compost: Yield and metal uptake  
432 of three different food crops. *Resour. Conserv. Recycl.*, 7(2-4), 221-234.

433 Contaminated Land Assessment & Remediation Research Centre. (2004). Kelly  
434 indices: Guidelines for classification of contaminated soils Retrieved December 2,  
435 2005, from Contaminated Land Assessment & Remediation Research Centre Web  
436 site:

437 [http://www.clarrc.ed.ac.uk/index.php?option=com\\_docman&task=docclick&Item](http://www.clarrc.ed.ac.uk/index.php?option=com_docman&task=docclick&Item)  
438 [id=57&bid=19&limitstart=0&limit=20](http://www.clarrc.ed.ac.uk/index.php?option=com_docman&task=docclick&Item)

439 Deb, M.K., Thakur, M., Mishra, R.K., Bodhankar, N. (2002). Assessment of  
440 atmospheric arsenic level in airborne dust particulates of an urban city of central  
441 India. *Water Air Soil Pollut.*, 140(1-4), 57-71.

- 442 Dickman, M.D., Leung, C.K., Leong, M.K. (1998). Hong Kong male subfertility links  
443 to mercury in human hair and fish. *Sci. Total Environ.*, 214, 165-174.
- 444 Dickman, M.D., Leung, K.M.C. (1998). Mercury and organochlorine exposure from  
445 fish consumption in Hong Kong. *Chemosphere*, 37(5), 991-1015.
- 446 Elinder, C. (1985). Cadmium: Uses, occurrence and intake. In Friberg, L., Elinder,  
447 C.G., Kjellstrom, T. (Eds.), *Cadmium and health: A toxicological and*  
448 *epidemiological appraisal. Volume I. Exposure, dose, and metabolism. Effects and*  
449 *response* (pp. 23-64). Boca Raton, FL: CRC Press.
- 450 Fang, F., Wang, Q., Li, J. (2004). Urban environmental mercury in Changchun, a  
451 metropolitan city in Northeastern China: Source, cycle, and fate. *Sci. Total*  
452 *Environ.*, 330(1-3), 159-170.
- 453 Fang, Z.Q., Cheung, R.Y., Wong, M.H. (2001). Heavy metal concentrations in edible  
454 bivalves and gastropods available in major markets of the Pearl River Delta. *J.*  
455 *Environ. Sci. (China)*, 13(2), 210-217.
- 456 Fang, Z.Q., Cheung, R.Y., Wong, M.H. (2003). Heavy metals in oysters, mussels and  
457 clams collected from coastal sites along the Pearl River Delta, South China. *J.*  
458 *Environ. Sci. (China)*, 15(1), 9-24.
- 459 French, C.J., Dickinson, N.M., Putwain, P.D. (2006). Woody biomass  
460 phytoremediation of contaminated brownfield land. *Environ. Pollut.*, 141(3), 387-  
461 395.
- 462 Friedlander, S.K. (1973). Chemical element balances and identification of air pollution  
463 sources. *Environ. Sci. Technol.*, 7(3), 235-240.
- 464 Gallagher, B. (2006). EQI highlights mercury threat Retrieved March 21, 2006, from  
465 University of North Carolina Web site:  
466 <http://www.unca.edu/banner/060223/features.html>



- 467 General Administration of Quality Supervision Inspection and Quarantine of the  
468 People's Republic of China. (2004). Retrieved April 4, 2004, from General  
469 Administration of Quality Supervision, Inspection and Quarantine of the People's  
470 Republic of China Web site: <http://www.aqsiq.gov.cn>
- 471 Guan, D., Chen, Y., Yuan, G. (2001). Study on heavy metal concentrations and the  
472 impact of human activity on them in urban and suburb soils of Guangzhou. *Acta*  
473 *Sci. Nat. Univ. Sunyatseni.*, 40(4), 93-101.
- 474 Hong Kong Environmental Protection Department. (1999). Ban on leaded petrol  
475 gazetted Retrieved February 13, 2004, from Press release Web site:  
476 [http://www.epd.gov.hk/epd/english/news\\_events/press/press\\_990205.html](http://www.epd.gov.hk/epd/english/news_events/press/press_990205.html)
- 477 Ip, P., Wong, V., Ho, M., Lee, J., Wong, W. (2004). Environmental mercury exposure  
478 in children: South China's experience. *Pediatr. Int.*, 46(6), 715-721.
- 479 Jin, R.B., Cui, H.M., Wang, S.X., Mao, J.D., Zhang, M., Chu, X.S. (1995). Experiment  
480 on feeding amino acid chelated copper to growing-finishing pigs. *J. Jiangsu Agric.*  
481 *Coll.*, 16(3), 47-50.
- 482 Kessler, J., Zogg, M., Bachler, E. (1994). Phosphorus, copper and zinc in the pig trough.  
483 *Agrarforschung*, 1(11-12), 480-483.
- 484 Kim, K.H., Kim, S.H. (1999). Heavy metal pollution of agricultural soils in central  
485 regions of Korea. *Water Air Soil Pollut.*, 111(1-4), 109-122.
- 486 Kong, K.Y., Cheung, K.C., Wong, C.K., Wong, M.H. (2005). Residues of DDTs, PAHs  
487 and some heavy metals in fish (tilapia) collected from Hong Kong and mainland  
488 China. *J. Environ. Sci. Health Part A Toxic-Hazard. Subst. Environ. Eng.*, 40(11),  
489 2105-2115.
- 490 Lee, Y.C., Hills, P.R. (2003). Cool season pollution episodes in Hong Kong, 1996-  
491 2002. *Atmos. Environ.*, 37(21), 2927-2939.

- 492 Li, X., Poon, C.S., Pui, S.L. (2001). Heavy metal contamination of urban soils and street  
493 dusts in Hong Kong. *Appl. Geochem.*, 16(11-12), 1361-1368.
- 494 Liu, J.H., Wang, W.H., Peng, A. (1998). Pollution and sources of mercury in top soil  
495 in two district of Beijing. *Acta. Sci. Circum.*, 18, 331-3336 (In Chinese).
- 496 Loredó, J., Ordóñez, A., Gallego, J.R., Baldo, C., García-Iglesias, J. (1999).  
497 Geochemical characterisation of mercury mining spoil heaps in the area of Mieres  
498 (Asturias, northern Spain). *J. Geochem. Explor.*, 67(1-3), 377-390.
- 499 Matthews, S., McCracken, I., Lonergan, G. (1995). Mercury contamination of golf  
500 courses due to pesticide use. *Bull. Environ. Contam. Toxicol.*, 55(3), 390-397.
- 501 McGrath, S.P. (2000). Risk assessment of metals. In Luo, W., McGrath, S.P. (Eds.),  
502 Proceedings of SoilRem 2000, International Conference of Soil Remediation.  
503 Hangzhou, China.
- 504 Ministry of Housing Spatial Planning and Environment, 2000. Circular on target values  
505 and intervention values for soil remediation. Ministry of Housing, Spatial Planning  
506 and Environment, Netherlands.
- 507 Mukherjee, A.B., Zevenhoven, R., Brodersen, J., Hylander, L.D., Bhattacharya, P.  
508 (2004). Mercury in waste in the European Union: sources, disposal methods and  
509 risks. *Resour. Conserv. Recycl.*, 42(2), 155-182.
- 510 Nakagawa, R., Hiromoto, M. (1997). Geographical distribution and background levels  
511 of total mercury in air in Japan and neighbouring countries. *Chemosphere*, 34(4),  
512 801-806.
- 513 Nicholson, F.A., Smith, S.R., Alloway, B.J., Carlton-Smith, C., Chambers, B.J. (2006).  
514 Quantifying heavy metal inputs to agricultural soils in England and Wales. *Wat.*  
515 *Environ. J.*, 20(2), 87-95.
- 516

- 517 Parsons, E.C.M. (1998). Trace metal pollution in Hong Kong: Implications for the  
518 health of Hong Kong's Indo-Pacific hump-backed dolphins (*Sousa chinensis*). *Sci.*  
519 *Total Environ.*, 214(1), 175-184.
- 520 Parsons, E.C.M. (1999). Trace element concentrations in the tissues of cetaceans from  
521 Hong Kong's territorial waters. *Environ. Conserv.*, 26, 30-40.
- 522 Reimann, C., Caritat, P.d. (1998). Chemical elements in the environment: Factsheets  
523 for the geochemist and environmental scientist. New York: Springer.
- 524 Renner, R. (2004). Arsenic and lead leach out of popular fertilizer. *Environ. Sci.*  
525 *Technol.*, 38(20), 382A.
- 526 Senesi, G.S., Baldassarre, G., Radina, B., Senesi, N. (1999). Trace element inputs into  
527 soils by anthropogenic activities and implications for human health. *Chemosphere*,  
528 39(2), 343-377.
- 529 Srivastava, R.K., Hutson, N., Martin, B., Princiotta, F., Staudt, J. (2006). Control of  
530 mercury emissions from coal-fired electric utility boilers. *Environ. Sci. Technol.*,  
531 40(5), 1385-1393.
- 532 State environmental Protection Administration of China. (1990). The Background  
533 Levels of Element in Soil in China. Beijing: Chinese Environmental Science Press  
534 (In Chinese).
- 535 State Environmental Protection Administration of China, 1995. Environmental quality  
536 standard for soils. State Environmental Protection Administration of China, China.
- 537 Swedish Environmental Protection Agency. (2002). Assessment of contamination level  
538 Retrieved December 2, 2005, from Swedish Environmental Protection Agency Web  
539 site: [http://www.internat.naturvardsverket.se/index.php3?main=/doc](http://www.internat.naturvardsverket.se/index.php3?main=/documents/legal/assess/assedoc/contdoc/pollevl.htm)  
540 [uments/legal/assess/assedoc/contdoc/pollevl.htm](http://www.internat.naturvardsverket.se/index.php3?main=/documents/legal/assess/assedoc/contdoc/pollevl.htm)

- 541 Tam, S.Y., Mok, C.S. (1991). Metallic contamination in oyster and other seafood in  
542 Hong Kong. *Food Addit. Contam.*, 8(3), 333-342.
- 543 U.S. Environmental Protection Agency, 1996a. Method 3052: Microwave assisted acid  
544 digestion of siliceous and organically based matrices SW-846. Test methods for  
545 evaluating solid wastes. Physical/chemical methods. U.S. Environmental  
546 Protection Agency, Washington, DC.
- 547 U.S. Environmental Protection Agency, 1996b. Method 7471B: Mercury in solid or  
548 semisolid waste (manual cold-vapor technique). SW-846. Test methods for  
549 evaluating solid wastes. Physical/chemical methods. U.S. Environmental  
550 Protection Agency, Washington, DC.
- 551 U.S. Environmental Protection Agency, 1996c. Soil screening guidance: User's guide.  
552 U.S. Environmental Protection Agency, Washington, DC.
- 553 UNEP, 2000. Technical guidelines on the identification and management of used tyres.  
554 Basel Convention series/SBC No. 02/10. Secretariat of the Basel Convention,  
555 Chatelaine.
- 556 USGS. (2006). Arsenic Retrieved July 12, 2006, from USGS Web site:  
557 <http://minerals.usgs.gov/minerals/pubs/commodity/arsenic/>
- 558 Viklander, M. (1997). Snow quality in urban areas. Unpublished doctoral dissertation,  
559 Luleå University of Technology, Luleå, Sweden.
- 560 Wang, D.Y. (2001). Distribution and behaviour of mercury in terrestrial ecosystem in  
561 acid deposition area. Chongqing, P.R. China: Xinan Agriculture University (In  
562 Chinese).
- 563 Wang, J.Y., Tong, Z.D., Yan, J.B. (2005). Study on the relationship between contents  
564 of poison in fishes and the levels of ocean pollutants in Zhoushan fishery. *Chin. J.*  
565 *Epidemiol.*, 26, 18-21 (In Chinese).

- 566 Wang, Q., Dong, Y., Cui, Y., Liu, X. (2001). Instances of soil and crop heavy metal  
567 contamination in China. *Soil Sediment Contam.*, 10(5), 497-511.
- 568 Wang, Z., Zhang, X., Chen, Z., Zhang, Y. (2006). Mercury concentrations in size-  
569 fractionated airborne particles at urban and suburban sites in Beijing, China. *Atmos.*  
570 *Environ.*, 40(12), 2194-2201.
- 571 Westerlund, K.G., 2001. Metal emission from Stockholm traffic - wear of brake linings.  
572 The Stockholm Environment and Health Protection Administration, Stockholm,  
573 Sweden.
- 574 Wong, M.H. (1990). Anaerobic digestion of pig waste mixed with sewage sludge. *Biol.*  
575 *Waste.*, 31, 223-230.
- 576 Wong, S.C., Li, X.D., Zhang, G., Qi, S.H., Min, Y.S. (2002). Heavy metals in  
577 agricultural soils of the Pearl River Delta, South China. *Environ. Pollut.*, 119(1),  
578 33-44.
- 579 Wong, S.C., Li, X.D., Zhang, G., Qi, S.H., Peng, X.Z. (2003). Atmospheric deposition  
580 of heavy metals in the Pearl River Delta, China. *Atmos. Environ.*, 37(6), 767-776.
- 581 Wu, X., Li, L., Pan, G., Ju, Y., Jiang, H. (2003). Soil pollution of Cu, Zn, Pb and Cd in  
582 different city zones of Nanjing. *Environ. Sci.*, 24(3), 105-111.
- 583 Yang, S.J., Dong, J.Q., Cheng, B.R. (2000). Characteristics of air particulate matter and  
584 their sources in urban and rural area of Beijing, China. *J. Environ. Sci.*, 12(4), 402-  
585 409.
- 586 Yim, W.W.S., Nau, P.S. (1987). Distribution of lead, zinc, copper and cadmium in dust  
587 from selected urban areas of Hong Kong. *Hong Kong Eng.*, 15(1), 7-14.
- 588 Yudovich, Y.E., Ketris, M.P. (2005). Mercury in coal: A review: Part 1. *Geochemistry.*  
589 *Int. J. Coal Geol.*, 62(3), 107-134.

- 590 Zhang, L., Wong, M.H. (2006). Environmental mercury contamination in China:  
591 Sources and impacts. *Environ. Int.*, In Press, Corrected Proof.
- 592 Zhou, H.Y., Wong, M.H. (2000). Mercury accumulation in freshwater fish with  
593 emphasis on the dietary influence. *Water Res.*, 34(17), 4234-4242.
- 594  
595
